# Supplementary material for: Molecular evolutionary dynamics of cytochrome P450 monooxygenases across kingdoms: Special focus on mycobacterial P450s
Source: PubMed Central journal article supplement (PMC5018878; doi:10.1038/srep33099), 2016-09-12
Supplement: srep33099-s1.pdf [file srep33099-s1.pdf]

## **Molecular evolutionary dynamics of cytochrome P450 monooxygenases across kingdoms: Special focus on mycobacterial P450s**

Mohammad Parvez<sup>1</sup>, Lehlohonolo Benedict Qhanya<sup>1</sup>, Ntsane Trevor Mthakathi<sup>1</sup>, Ipeleng Kopano Rosinah Kgosiemang<sup>1</sup>, Hans Denis Bamal<sup>1</sup>, Nataraj Sekhar Pagadala<sup>2</sup>, Ting Xie<sup>3</sup>, Haoran Yang<sup>4</sup>, Hengye Chen<sup>4</sup>, Chrispian William Theron<sup>5</sup>, Richie Monyaki<sup>1</sup>, Seiso Caiphus Raseleman<sup>1</sup>, Vuyani Salewe<sup>1</sup>, Bogadi Lorato Mongale<sup>1</sup>, Retshedisitswe Godfrey Matowane<sup>1</sup>, Sara Mohamed Hasaan Abdalla<sup>1</sup>, Wool Isaac Boo<sup>1</sup>, Mari van Wyk<sup>1</sup>, Dédé Olivier<sup>1</sup>, Charlotte E Boucher<sup>5</sup>, David R Nelson<sup>6</sup>, Jack A Tuszynski<sup>7</sup>, Jonathan Michael Blackburn<sup>8</sup>, Jae-Hyuk Yu<sup>9</sup>, Samson Sitheni Mashele<sup>1\*</sup>, Wanping Chen<sup>4\*</sup>, Khajamohiddin Syed<sup>1\*</sup>

<sup>1</sup> Unit for Drug Discovery Research, Department of Health Sciences, Faculty of Health and Environmental Sciences, Central University of Technology, Bloemfontein 9300, Free State, South Africa

<sup>2</sup> Department of Medical Microbiology and Immunology, 6-020 Katz Group Centre, University of Alberta, Edmonton, Alberta T6G 2E1, Canada

<sup>3</sup> College of Informatics, Huazhong Agricultural University, Wuhan, Hubei Province, China

<sup>4</sup> College of Food Science and Technology, Huazhong Agricultural University, Wuhan, Hubei Province, China

<sup>5</sup> Faculty of Natural and Agricultural Science, Department of Microbial, Biochemical and Food Biotechnology, University of the Free State, P.O Box 339, Bloemfontein, 9300, South Africa.

<sup>6</sup> Department of Microbiology, Immunology and Biochemistry, University of Tennessee Health Science Center, Memphis, TN 38163, USA

<sup>7</sup> Department of Physics, University of Alberta, Edmonton, Alberta T6G 2J1, Canada

<sup>8</sup>Institute of Infectious Disease & Molecular Medicine; Department of Integrative Biomedical Sciences, Faculty of Health Sciences, University of Cape Town, Cape Town 7925, South Africa

<sup>9</sup>Department of Bacteriology, University of Wisconsin-Madison, 3155 MSB, 1550 Linden Drive, Madison WI 53706, USA

**Keywords:** Mycobacteria, P450, Evolution, Conservation, Divergence, Bacteria, Plant, Fungi, Animal, *Mycobacterium tuberculosis*, Diagnostic-markers, Evolutionary rates

\* Corresponding authors' email: khajamohiddinsyed@gmail.com & chenwanping@mail.hzau.edu.cn & smashele@cut.ac.za

Fig. S1. A high-resolution phylogenetic tree of Mycobacterial P450s.

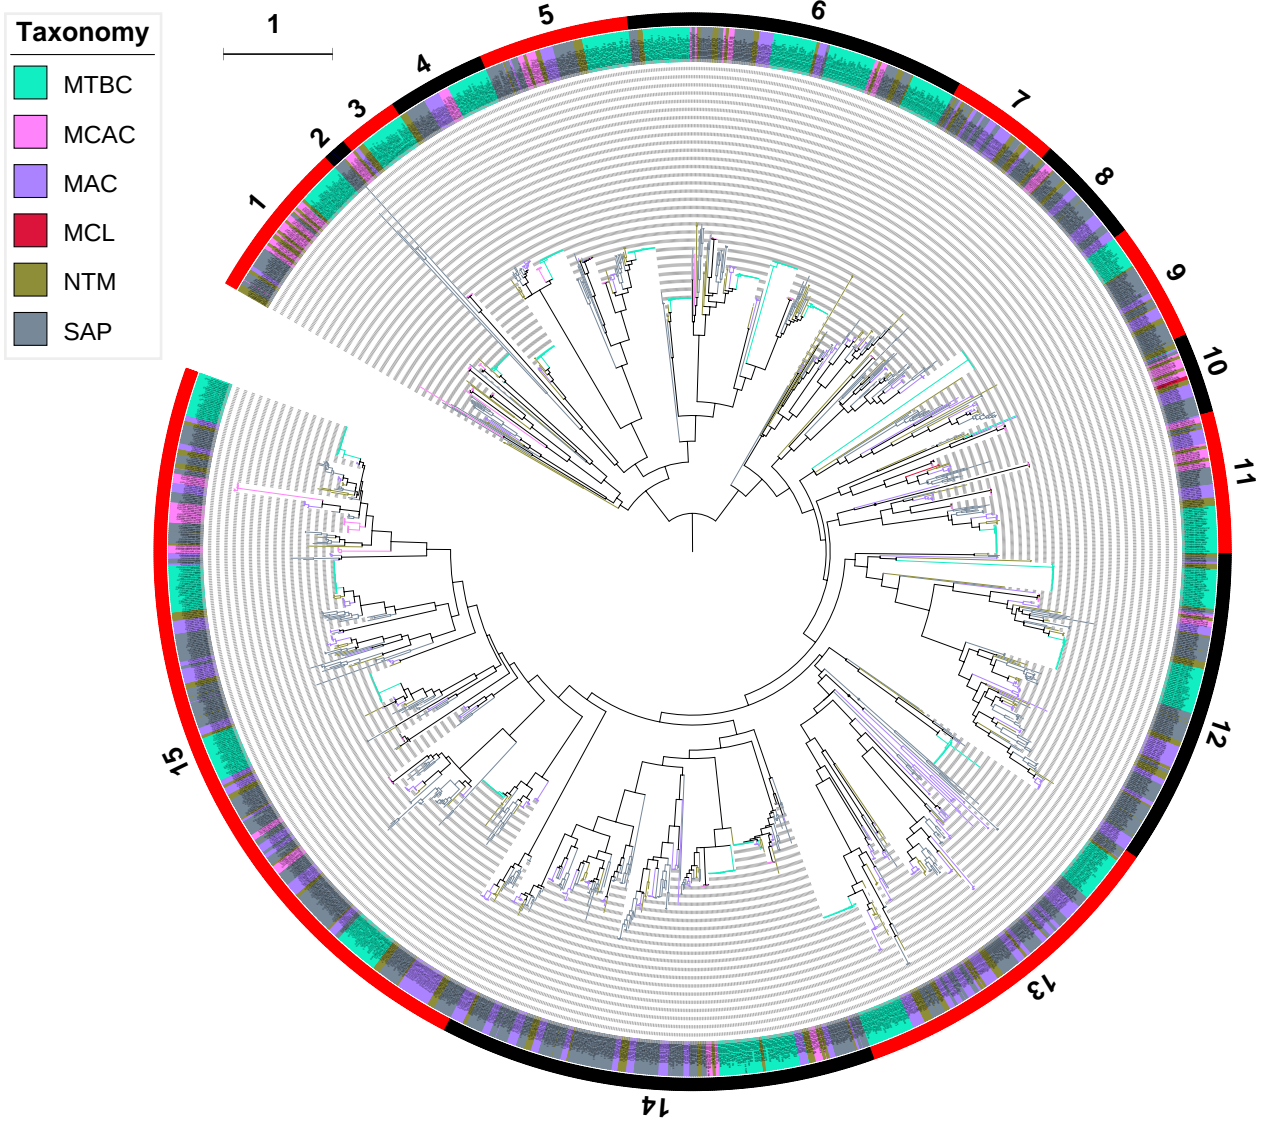

**Supplementary Table S1.** List of mycobacterial species used in the study. As listed in the table, 60 mycobacterial species were grouped under six different categories based on their characteristic features, including ecological niches, nature of infection and site of infection as described elsewhere (1-5). Also taxonomical grouping of mycobacterial is taken into consideration as described elsewhere (6).

| <b><i>Mycobacterium tuberculosis</i> complex (MTBC)</b>       |                                                               |
|---------------------------------------------------------------|---------------------------------------------------------------|
| 1                                                             | <i>Mycobacterium africanum</i> GM041182                       |
| 2                                                             | <i>Mycobacterium tuberculosis</i> C                           |
| 3                                                             | <i>Mycobacterium tuberculosis</i> F11                         |
| 4                                                             | <i>Mycobacterium tuberculosis</i> H37Ra                       |
| 5                                                             | <i>Mycobacterium tuberculosis</i> H37Rv                       |
| 6                                                             | <i>Mycobacterium tuberculosis</i> Haarlem                     |
| 7                                                             | <i>Mycobacterium tuberculosis</i> KZN 1435                    |
| 8                                                             | <i>Mycobacterium tuberculosis</i> KZN 605                     |
| 9                                                             | <i>Mycobacterium tuberculosis</i> KZN 4207                    |
| 10                                                            | <i>Mycobacterium tuberculosis</i> RGTB327                     |
| 11                                                            | <i>Mycobacterium tuberculosis</i> CDC1551                     |
| 12                                                            | <i>Mycobacterium tuberculosis</i> strains CCDC5079            |
| 13                                                            | <i>Mycobacterium tuberculosis</i> 7199-99                     |
| 14                                                            | <i>Mycobacterium tuberculosis</i> Beijing/NITR203             |
| 15                                                            | <i>Mycobacterium tuberculosis</i> CAS/NITR204                 |
| 16                                                            | <i>Mycobacterium tuberculosis</i> EAI5                        |
| 17                                                            | <i>Mycobacterium tuberculosis</i> EAI5/NITR206                |
| 18                                                            | <i>Mycobacterium tuberculosis</i> Erdman= ATCC 35801          |
| 19                                                            | <i>Mycobacterium tuberculosis</i> UT205                       |
| 20                                                            | <i>Mycobacterium canettii</i> CIPT 140010059                  |
| 21                                                            | <i>Mycobacterium canettii</i> CIPT 140060008                  |
| 22                                                            | <i>Mycobacterium canettii</i> CIPT 140710010                  |
| 23                                                            | <i>Mycobacterium bovis</i> AF 2122/97                         |
| 24                                                            | <i>Mycobacterium bovis</i> BCG Pasteur 1173P2                 |
| 25                                                            | <i>Mycobacterium bovis</i> BCG Korea 1168P                    |
| 26                                                            | <i>Mycobacterium bovis</i> BCG Mexico                         |
| 27                                                            | <i>Mycobacterium bovis</i> BCG Tokyo 172                      |
| <b><i>Mycobacterium chelonae-abscessus</i> complex (MCAC)</b> |                                                               |
| 28                                                            | <i>Mycobacterium abscessus</i> ATCC 19977                     |
| 29                                                            | <i>Mycobacterium abscessus</i> subsp. <i>bolletii</i> 50594   |
| 30                                                            | <i>Mycobacterium abscessus</i> 47J26                          |
| 31                                                            | <i>Mycobacterium abscessus</i> 103                            |
| 32                                                            | <i>Mycobacterium abscessus</i> subsp. <i>bolletii</i> MA 1948 |
| 33                                                            | <i>Mycobacterium abscessus</i> VO6705                         |
| <b><i>Mycobacterium avium</i> complex (MAC)</b>               |                                                               |
| 34                                                            | <i>Mycobacterium Avium</i> 104                                |
| 35                                                            | <i>Mycobacterium Avium</i> subsp. <i>paratuberculosis</i> K10 |

|                                           |                                                                |
|-------------------------------------------|----------------------------------------------------------------|
| 36                                        | <i>Mycobacterium avium</i> subsp. <i>paratuberculosis</i> MAP4 |
| 37                                        | <i>Mycobacterium intracellulare</i> ATCC 13950                 |
| 38                                        | <i>Mycobacterium intracellulare</i> MOTT-02                    |
| 39                                        | <i>Mycobacterium Intracellulare</i> MOTT-64                    |
| 40                                        | <i>Mycobacterium intracellulare</i> MOTT-36Y                   |
| 41                                        | <i>Mycobacterium Indicus pranii</i> MTCC 9506                  |
| <b>Mycobacteria causing leprosy (MCL)</b> |                                                                |
| 42                                        | <i>Mycobacterium leprae</i> Br4923                             |
| 43                                        | <i>Mycobacterium Leprae</i> TN                                 |
| <b>Nontuberculous mycobacteria (NTM)</b>  |                                                                |
| 44                                        | <i>Mycobacterium</i> sp. JDM601                                |
| 45                                        | <i>Mycobacterium liflandii</i> 128FXT                          |
| 46                                        | <i>Mycobacterium ulcerans</i> Agy99                            |
| 47                                        | <i>Mycobacterium Marinum</i>                                   |
| 48                                        | <i>Mycobacterium massiliense</i>                               |
| 49                                        | <i>Mycobacterium kansasii</i> ATCC 12478                       |
| <b>Saprophytes (SAP)</b>                  |                                                                |
| 50                                        | <i>Mycobacterium</i> sp. JLS                                   |
| 51                                        | <i>Mycobacterium</i> sp. KMS                                   |
| 52                                        | <i>Mycobacterium</i> sp. MCS                                   |
| 53                                        | <i>Mycobacterium vanbaalenii</i> PYR-1                         |
| 54                                        | <i>Mycobacterium smegmatis</i> MC2 155                         |
| 55                                        | <i>Mycobacterium chubuense</i> NBB4                            |
| 56                                        | <i>Mycobacterium gilvum</i> PYR-GCK                            |
| 57                                        | <i>Mycobacterium gilvum</i> Spyr1                              |
| 58                                        | <i>Mycobacterium smegmatis</i> JS623                           |
| 59                                        | <i>Mycobacterium rhodesiae</i> NBB3                            |
| 60                                        | <i>Mycobacterium neoaurum</i> VKM Ac-1815D                     |

**Supplementary Table S2.** Information on mycobacterial species genome databases and their web links used in the study.

| Database    | Weblink                                                                                                                                             | Reference |
|-------------|-----------------------------------------------------------------------------------------------------------------------------------------------------|-----------|
| TB Database | <a href="http://genome.tdb.org/tbdb_sysbio/GenomesIndex.html">http://genome.tdb.org/tbdb_sysbio/GenomesIndex.html</a>                               | 1, 2      |
| KEGG        | <a href="http://www.genome.jp/kegg-bin/show_organism?category=Mycobacterium">http://www.genome.jp/kegg-bin/show_organism?category=Mycobacterium</a> | 3,4       |
| UniProt     | <a href="http://www.uniprot.org/taxonomy/36809">http://www.uniprot.org/taxonomy/36809</a>                                                           | 5         |

**Supplementary Table S3.** Genome data-mining, identification and annotation of cytochrome P450 monooxygenases in 60 mycobacterial species. Open reading frames (ORFs) for each species were obtained from KEGG database<sup>3,4</sup>.

| Name of the species                                    | P450 count | Families | Sub-families | OR Fs | % of P450s |
|--------------------------------------------------------|------------|----------|--------------|-------|------------|
| <b>Mycobacterium tuberculosis complex (MTBC)</b>       |            |          |              |       |            |
| <i>Mycobacterium africanum</i> GM041182                | 17         | 16       | 17           | 3830  | 0.4        |
| <i>Mycobacterium tuberculosis</i> C                    | 20         | 19       | 20           | 3851  | 0.5        |
| <i>Mycobacterium tuberculosis</i> F11                  | 20         | 19       | 20           | 3941  | 0.5        |
| <i>Mycobacterium tuberculosis</i> H37Ra                | 20         | 19       | 20           | 4034  | 0.5        |
| <i>Mycobacterium tuberculosis</i> H37Rv                | 20         | 19       | 20           | 3936  | 0.5        |
| <i>Mycobacterium tuberculosis</i> Haarlem              | 19         | 18       | 19           | 3866  | 0.5        |
| <i>Mycobacterium tuberculosis</i> KZN 1435             | 20         | 19       | 20           | 4059  | 0.5        |
| <i>Mycobacterium tuberculosis</i> KZN 605              | 20         | 19       | 20           | 4001  | 0.5        |
| <i>Mycobacterium tuberculosis</i> KZN 4207             | 21         | 19       | 20           | 3996  | 0.5        |
| <i>Mycobacterium tuberculosis</i> RGTB327              | 14         | 14       | 14           | 3691  | 0.4        |
| <i>Mycobacterium tuberculosis</i> CDC1551              | 20         | 19       | 20           | 4189  | 0.5        |
| <i>Mycobacterium tuberculosis</i> strains CCDC5079     | 20         | 19       | 20           | 3646  | 0.5        |
| <i>Mycobacterium tuberculosis</i> 7199-99              | 19         | 18       | 19           | 3994  | 0.5        |
| <i>Mycobacterium tuberculosis</i> Beijing/NITR203      | 20         | 19       | 20           | 4110  | 0.5        |
| <i>Mycobacterium tuberculosis</i> CAS/NITR204          | 17         | 16       | 16           | 3959  | 0.4        |
| <i>Mycobacterium tuberculosis</i> EAI5                 | 19         | 18       | 19           | 3902  | 0.5        |
| <i>Mycobacterium tuberculosis</i> EAI5/NITR206         | 20         | 19       | 20           | 4019  | 0.5        |
| <i>Mycobacterium tuberculosis</i> Erdman= ATCC 35801   | 19         | 18       | 19           | 4246  | 0.4        |
| <i>Mycobacterium tuberculosis</i> UT205                | 19         | 18       | 19           | 3794  | 0.5        |
| <i>Mycobacterium canetii</i> CIPT 140010059            | 19         | 18       | 19           | 3861  | 0.5        |
| <i>Mycobacterium canetii</i> CIPT 140060008            | 18         | 17       | 18           | 3981  | 0.5        |
| <i>Mycobacterium canetii</i> CIPT 140710010            | 21         | 19       | 20           | 3861  | 0.5        |
| <i>Mycobacterium bovis</i> AF 2122/97                  | 18         | 17       | 18           | 3920  | 0.5        |
| <i>Mycobacterium bovis</i> BCG Pasteur 1173P2          | 18         | 17       | 18           | 3952  | 0.5        |
| <i>Mycobacterium bovis</i> BCG Korea 1168P             | 18         | 17       | 18           | 4139  | 0.4        |
| <i>Mycobacterium bovis</i> BCG Mexico                  | 18         | 17       | 18           | 3951  | 0.5        |
| <i>Mycobacterium bovis</i> BCG Tokyo 172               | 18         | 17       | 18           | 3944  | 0.5        |
| <b>Mycobacterium chelonae-abscessus complex (MCAC)</b> |            |          |              |       |            |
| <i>Mycobacterium abscessus</i> ATCC 19977              | 25         | 19       | 22           | 4942  | 0.5        |
| <i>Mycobacterium abscessus</i> subsp. bolletii 50594   | 22         | 18       | 20           | 5185  | 0.4        |
| <i>Mycobacterium abscessus</i> 47J26                   | 25         | 19       | 22           | 4823  | 0.5        |
| <i>Mycobacterium abscessus</i> 103                     | 25         | 19       | 22           | 4867  | 0.5        |
| <i>Mycobacterium abscessus</i> subsp. bolletii MA 1948 | 24         | 18       | 21           | 4883  | 0.5        |

|                                                         |    |    |    |      |     |
|---------------------------------------------------------|----|----|----|------|-----|
| <i>Mycobacterium abscessus</i> VO6705                   | 28 | 19 | 24 | 5129 | 0.5 |
| <b>Mycobacterium avium complex (MAC)</b>                |    |    |    |      |     |
| <i>Mycobacterium Avium</i> 104                          | 48 | 29 | 34 | 5120 | 0.9 |
| <i>Mycobacterium Avium</i> subsp. paratuberculosis K10  | 43 | 30 | 33 | 4350 | 1.0 |
| <i>Mycobacterium avium</i> subsp. paratuberculosis MAP4 | 43 | 30 | 33 | 4326 | 1.0 |
| <i>Mycobacterium intracellulare</i> ATCC 13950          | 43 | 26 | 31 | 5144 | 0.8 |
| <i>Mycobacterium intracellulare</i> MOTT-02             | 47 | 26 | 31 | 5149 | 0.9 |
| <i>Mycobacterium Intracellulare</i> MOTT-64             | 42 | 25 | 28 | 5249 | 0.8 |
| <i>Mycobacterium intracellulare</i> MOTT-36Y            | 48 | 29 | 34 | 5129 | 0.9 |
| <i>Mycobacterium Indicus pranii</i> MTCC 9506           | 61 | 30 | 36 | 5254 | 1.2 |
| <b>Mycobacteria causing leprosy (MCL)</b>               |    |    |    |      |     |
| <i>Mycobacterium leprae</i> Br4923                      | 1  | 1  | 1  | 1604 | 0.1 |
| <i>Mycobacterium Leprae</i> TN                          | 1  | 1  | 1  | 1605 | 0.1 |
| <b>Nontuberculous mycobacteria (NTM)</b>                |    |    |    |      |     |
| <i>Mycobacterium</i> sp. JDM601                         | 37 | 24 | 26 | 4346 | 0.9 |
| <i>Mycobacterium liflandii</i> 128FXT                   | 35 | 29 | 30 | 5064 | 0.7 |
| <i>Mycobacterium ulcerans</i> Agy99                     | 20 | 18 | 18 | 4241 | 0.5 |
| <i>Mycobacterium Marinum</i>                            | 47 | 36 | 39 | 5452 | 0.9 |
| <i>Mycobacterium massiliense</i>                        | 19 | 16 | 19 | 4314 | 0.4 |
| <i>Mycobacterium kansasii</i> ATCC 12478                | 42 | 32 | 35 | 5866 | 0.7 |
| <b>Saprophytes (SAP)</b>                                |    |    |    |      |     |
| <i>Mycobacterium</i> sp. JLS                            | 56 | 30 | 38 | 5739 | 1.0 |
| <i>Mycobacterium</i> sp. KMS                            | 54 | 29 | 35 | 5975 | 0.9 |
| <i>Mycobacterium</i> sp. MCS                            | 53 | 28 | 34 | 5615 | 0.9 |
| <i>Mycobacterium vanbaalenii</i> PYR-1                  | 49 | 31 | 37 | 5979 | 0.8 |
| <i>Mycobacterium smegmatis</i> MC2 155                  | 42 | 27 | 30 | 6717 | 0.6 |
| <i>Mycobacterium chubuense</i> NBB4                     | 46 | 26 | 31 | 5843 | 0.8 |
| <i>Mycobacterium gilvum</i> PYR-GCK                     | 51 | 29 | 34 | 5579 | 0.9 |
| <i>Mycobacterium gilvum</i> Spyr1                       | 51 | 28 | 33 | 5349 | 1.0 |
| <i>Mycobacterium smegmatis</i> JS623                    | 51 | 30 | 38 | 6939 | 0.7 |
| <i>Mycobacterium rhodesiae</i> NBB3                     | 70 | 35 | 43 | 6147 | 1.1 |
| <i>Mycobacterium neoaurum</i> VKM Ac-1815D              | 23 | 19 | 23 | 5318 | 0.4 |



**Supplementary Table S4.** Comparative analysis of P450 families between different mycobacterial categories. For each P450 family, the number of member P450s (P450 count) and their percentage in the total number of P450s (1 786) found in mycobacterial species were shown. This includes CYP164 P450s from the Mycobacterium causing leprosy (MCL). However, the MCL category is not presented in the table, considering the presence of a single P450 CYP164 in their genome. The number of species belonging to different categories (MTBC, MCAC, MAC, NTM and SAP) used in the analysis is shown in parenthesis next to the category name. The distribution of member P450s in the category is as follows: min-max number of P450s or number of member P450s in the category members/number of category members possessing the member P450. The empty boxes with green fluorescent color indicate the absence of P450 family members in the category. Abbreviations: MTBC, *Mycobacterium tuberculosis* complex; MCAC, *Mycobacterium chelonae-abscessus* complex; MAC, *Mycobacterium avium* complex; NTM, Nontuberculous mycobacteria; SAP, Saprophytes.

| <b>P450 family</b> | <b>P450 count</b> | <b>Percentage</b> | <b>MTBC (27)</b> | <b>MCAC (6)</b> | <b>MAC (8)</b> | <b>NTM (6)</b> | <b>SAP (11)</b> |
|--------------------|-------------------|-------------------|------------------|-----------------|----------------|----------------|-----------------|
| CYP51              | 54                | 3.0               | 1/24             | 1/6             | 1-2/8          | 1/4            | 1/11            |
| CYP123             | 63                | 3.5               | 1-2/26           | 1/6             | 1-2/5          | 1/5            | 1-2/11          |
| CYP125             | 114               | 6.4               | 1/25             | 3-4/6           | 1-3/8          | 1-5/5          | 1-4/10          |
| CYP130             | 51                | 2.9               | 1/21             | 1/6             | 1/8            | 1/5            | 1/11            |
| CYP135             | 81                | 4.5               | 1/27             | 1/6             | 1/4            | 1-3/4          | 1/10            |
| CYP136             | 82                | 4.6               | 1/27             | 1/6             | 1/8            | 1-2/6          | 1-2/11          |
| CYP138             | 72                | 4.0               | 1/26             | 1-2/6           | 1/8            | 1-3/5          | 1-2/11          |
| CYP140             | 72                | 4.0               | 1/27             | 1/6             | 1/8            | 1/6            | 1/9             |
| CYP144             | 58                | 3.2               | 1/27             | 1/6             | 1/6            | 1-2/6          | 1-2/11          |

|         |    |     |        |     |       |       |        |
|---------|----|-----|--------|-----|-------|-------|--------|
| CYP1128 | 10 | 0.6 | 1/1    | 1/6 | 1/1   | 1/1   | 1/1    |
| CYP108  | 56 | 3.1 |        | 1/6 | 1-2/8 | 1/4   | 1-3/11 |
| CYP164  | 29 | 1.6 |        | 1/6 | 1/8   | 1/3   | 1/10   |
| CYP124  | 59 | 3.3 | 1/27   |     | 1-2/7 | 1/4   | 1-2/11 |
| CYP126  | 50 | 2.8 | 1/26   |     | 1/8   | 1/5   | 1/11   |
| CYP128  | 32 | 1.8 | 1-2/26 |     | 1/2   | 1/1   | 1/3    |
| CYP142  | 59 | 3.3 | 1/26   |     | 1-2/8 | 1/5   | 1/11   |
| CYP143  | 62 | 3.5 | 1/27   |     | 1-2/7 | 1-2/5 | 1-2/6  |
| CYP105  | 45 | 2.5 |        |     | 1-2/5 | 1/5   | 1-2/11 |
| CYP185  | 18 | 1.0 |        |     | 1/3   | 1/2   | 1-2/10 |
| CYP187  | 54 | 3.0 |        |     | 2-4/8 | 1-2/5 | 1-4/10 |
| CYP188  | 39 | 2.2 |        |     | 2/8   | 1/5   | 1-3/10 |
| CYP189  | 86 | 4.8 |        |     | 3-5/8 | 1-2/5 | 1-6/10 |
| CYP190  | 44 | 2.5 |        |     | 1-3/8 | 1/4   | 1-3/10 |
| CYP191  | 21 | 1.2 |        |     | 1/8   | 1/4   | 1/10   |
| CYP243  | 6  | 0.3 |        |     | 1/4   | 1/1   | 1/1    |
| CYP268  | 28 | 1.6 |        |     | 1/8   | 1/4   | 1-3/10 |
| CYP279  | 47 | 2.6 |        |     | 1-4/8 | 1/3   | 1-4/10 |
| CYP150  | 84 | 4.7 |        |     | 2-6/8 | 1-5/5 | 3-5/10 |
| CYP1027 | 6  | 0.3 |        |     | 1/4   | 1/1   | 1/1    |
| CYP137  | 32 | 1.8 | 1-2/27 |     |       | 1/3   | 1/1    |
| CYP139  | 33 | 1.8 | 1/26   |     | 1/3   | 1/4   |        |
| CYP1134 | 7  | 0.4 |        | 1/6 | 1/1   | 1/1   |        |
| CYP286  | 8  | 0.4 |        | 1/6 |       | 1/1   | 1/1    |
| CYP153  | 11 | 0.6 |        | 1/4 |       | 1/1   | 1/6    |
| CYP161  | 8  | 0.4 |        | 1/6 |       | 1/1   | 1/1    |

|         |    |     |             |            |              |            |              |
|---------|----|-----|-------------|------------|--------------|------------|--------------|
| CYP132  | 27 | 1.5 | <b>1/26</b> |            |              | <b>1/1</b> |              |
| CYP102  | 5  | 0.3 |             | <b>1/1</b> |              |            | <b>1/4</b>   |
| CYP1110 | 5  | 0.3 |             | <b>1/4</b> |              | <b>1/1</b> |              |
| CYP1130 | 16 | 0.9 |             | <b>1/6</b> |              | <b>1/2</b> |              |
| CYP1132 | 7  | 0.4 |             | <b>1/6</b> |              | <b>1/1</b> |              |
| CYP272  | 4  | 0.2 |             |            | <b>1/3</b>   | <b>1/1</b> |              |
| CYP291  | 15 | 0.8 |             |            | <b>1/8</b>   |            | <b>1-2/5</b> |
| CYP1034 | 3  | 0.2 |             |            | <b>1/1</b>   |            | <b>1/1</b>   |
| CYP1124 | 6  | 0.3 |             |            | <b>1/4</b>   |            | <b>1/2</b>   |
| CYP1129 | 6  | 0.3 |             |            | <b>1-2/4</b> |            | <b>1/1</b>   |
| CYP107  | 2  | 0.1 |             |            |              | <b>1/1</b> | <b>1/1</b>   |
| CYP147  | 5  | 0.3 |             |            |              | <b>1/3</b> | <b>1/1</b>   |
| CYP278  | 4  | 0.2 |             |            |              | <b>1/2</b> | <b>1/2</b>   |
| CYP121  | 23 | 1.3 | <b>1/23</b> |            |              |            |              |
| CYP141  | 19 | 1.1 | <b>1/19</b> |            |              |            |              |
| CYP1131 | 1  | 0.1 |             | <b>1/6</b> |              |            |              |
| CYP1016 | 2  | 0.1 |             |            | <b>1/2</b>   |            |              |
| CYP1017 | 2  | 0.1 |             |            | <b>1/2</b>   |            |              |
| CYP1018 | 6  | 0.3 |             |            | <b>1-2/2</b> |            |              |
| CYP1019 | 4  | 0.2 |             |            | <b>2/2</b>   |            |              |
| CYP1067 | 1  | 0.1 |             |            | <b>1/1</b>   |            |              |
| CYP183  | 2  | 0.1 |             |            |              | <b>1/2</b> |              |
| CYP226  | 2  | 0.1 |             |            |              | <b>1/2</b> |              |
| CYP269  | 2  | 0.1 |             |            |              | <b>1/2</b> |              |
| CYP271  | 1  | 0.1 |             |            |              | <b>1/1</b> |              |
| CYP274  | 2  | 0.1 |             |            |              | <b>1/2</b> |              |

|         |   |     |  |  |  |            |            |
|---------|---|-----|--|--|--|------------|------------|
| CYP276  | 2 | 0.1 |  |  |  | <b>1/2</b> |            |
| CYP1120 | 1 | 0.1 |  |  |  | <b>1/1</b> |            |
| CYP1123 | 1 | 0.1 |  |  |  | <b>1/1</b> |            |
| CYP1133 | 1 | 0.1 |  |  |  | <b>1/1</b> |            |
| CYP1127 | 1 | 0.1 |  |  |  | <b>1/1</b> |            |
| CYP110  | 3 | 0.2 |  |  |  |            | <b>1/3</b> |
| CYP145  | 4 | 0.2 |  |  |  |            | <b>1/3</b> |
| CYP151  | 2 | 0.1 |  |  |  |            | <b>1/2</b> |
| CYP186  | 4 | 0.2 |  |  |  |            | <b>1/4</b> |
| CYP289  | 2 | 0.1 |  |  |  |            | <b>1/2</b> |
| CYP292  | 5 | 0.3 |  |  |  |            | <b>1/5</b> |
| CYP1119 | 1 | 0.1 |  |  |  |            | <b>1/1</b> |
| CYP1121 | 1 | 0.1 |  |  |  |            | <b>1/1</b> |
| CYP1122 | 1 | 0.1 |  |  |  |            | <b>1/1</b> |
| CYP1125 | 1 | 0.1 |  |  |  |            | <b>1/1</b> |
| CYP1126 | 1 | 0.1 |  |  |  |            | <b>1/1</b> |

**Supplementary Table S5.** Clan-level classification of mycobacterial P450 families.

Abbreviations: MTBC, *Mycobacterium tuberculosis* complex; MCAC, *Mycobacterium chelonae-abscessus* complex; MAC, *Mycobacterium avium* complex; NTM, Nontuberculous mycobacteria; SAP, Saprophytes.

| <b>Clan</b> | <b>CYP family</b>                                                                                                                     | <b>Group</b>              |
|-------------|---------------------------------------------------------------------------------------------------------------------------------------|---------------------------|
| 1           | CYP183, CYP274, CYP102, CYP185, CYP1131, CYP1132, CYP1130, CYP1121, CYP1133, CYP1134, CYP132                                          | MTBC, MCAC, MAC, NTM, SAP |
| 2           | CYP1119, CYP186, CYP286                                                                                                               | SAP, MCAC, NTM, SAP       |
| 3           | CYP139                                                                                                                                | MTBC, MAC, NTM            |
| 4           | CYP51                                                                                                                                 | MTBC, MCAC, MAC, NTM, SAP |
| 5           | CYP136                                                                                                                                | MTBC, MCAC, MAC, NTM, SAP |
| 6           | CYP110, CYP137, CYP138, CYP135                                                                                                        | MTBC, MCAC, MAC, NTM, SAP |
| 7           | CYP1125, CYP226, CYP1034, CYP187                                                                                                      | MAC, SAP, NTM, MTBC       |
| 8           | CYP276, CYP161, CYP151, CYP279                                                                                                        | NTM, MCAC, MAC, SAP       |
| 9           | CYP141, CYP1127, CYP105                                                                                                               | MTBC, NTM, MAC, SAP       |
| 10          | CYP147, CYP1128, CYP164                                                                                                               | MTBC, MCAC, MAC, NTM, SAP |
| 11          | CYP1067, CYP1110, CYP140                                                                                                              | MTBC, MCAC, MAC, NTM, SAP |
| 12          | CYP278, CYP1016, CYP269, CYP121, CYP1120, CYP1126, CYP144, CYP150                                                                     | MTBC, MCAC, MAC, NTM, SAP |
| 13          | CYP1122, CYP1123, CYP128, CYP145, CYP289, CYP1018, CYP1019, CYP292, CYP1017, CYP1129, CYP243, CYP188, CYP271, CYP272, CYP1027, CYP143 | MTBC, MCAC, MAC, NTM, SAP |

|    |                                                                                    |                              |
|----|------------------------------------------------------------------------------------|------------------------------|
| 14 | CYP123, CYP130, CYP190, CYP189                                                     | MTBC, MCAC, MAC,<br>NTM, SAP |
| 15 | CYP191, CYP142, CYP108, CYP291, CYP153,<br>CYP125, CYP126, CYP268, CYP124, CYP1124 | MTBC, MCAC, MAC,<br>NTM, SAP |

**Supplementary Table S6.** P450 diversity percentage analysis in mycobacterial species. Comparative analysis of P450 diversity percentage between mycobacterial species with other lower eukaryote microbes such as fungi and oomycetes are also shown in the table. The P450 diversity percentage data for lower eukaryotes such as fungi and oomycetes were retrieved from published literature<sup>7-12</sup>.

| <b>Group</b>          | <b>Number of species</b> | <b>P450 diversity percentage</b> |                                        |                                          |
|-----------------------|--------------------------|----------------------------------|----------------------------------------|------------------------------------------|
| MTBC                  | 27                       | 95                               |                                        |                                          |
| NTM                   | 6                        | 79                               |                                        |                                          |
| MCAC                  | 6                        | 75                               |                                        |                                          |
| MAC                   | 8                        | 61                               |                                        |                                          |
| SAP                   | 11                       | 59                               |                                        |                                          |
|                       |                          |                                  |                                        |                                          |
|                       | <b>Number of species</b> | <b>Average number of P450s</b>   | <b>Average number of P450 families</b> | <b>Average P450 diversity percentage</b> |
| Mycobacterial species | 60                       | 29.75                            | 21.5                                   | 72                                       |
| Saccharomycetes       | 19                       | 8.11                             | 4.79                                   | 59                                       |
| Pezizomycetes         | 17                       | 87.35                            | 59.71                                  | 68                                       |
| Basidiomycetes        | 13                       | 157.00                           | 32.85                                  | 21                                       |
| Zygomycetes           | 3                        | 50.33                            | 15.00                                  | 30                                       |
| Oomycetes             | 13                       | 27.38                            | 4.00                                   | 15                                       |

**Supplementary Table S7.** Conserved amino acid analysis in mycobacterial P450s. The conservation score (5-9) obtained *via* PROMALS3D is shown in the table, where the number “9” indicates conserved amino acid in P450 members.

| P450 family | Number of member P450s | PROMALS3D conservation score |     |    |    |     |
|-------------|------------------------|------------------------------|-----|----|----|-----|
|             |                        | 5                            | 6   | 7  | 8  | 9   |
| CYP141      | 19                     | 0                            | 0   | 0  | 0  | 398 |
| CYP51       | 54                     | 11                           | 102 | 0  | 0  | 264 |
| CYP137      | 32                     | 146                          | 0   | 0  | 0  | 267 |
| CYP132      | 27                     | 0                            | 0   | 0  | 0  | 325 |
| CYP121      | 23                     | 0                            | 0   | 0  | 0  | 391 |
| CYP191      | 21                     | 56                           | 51  | 54 | 0  | 197 |
| CYP140      | 72                     | 65                           | 24  | 57 | 0  | 72  |
| CYP139      | 33                     | 130                          | 0   | 0  | 0  | 211 |
| CYP124      | 59                     | 60                           | 23  | 86 | 0  | 111 |
| CYP126      | 50                     | 54                           | 89  | 36 | 0  | 140 |
| CYP123      | 58                     | 86                           | 9   | 76 | 0  | 69  |
| CYP108      | 55                     | 76                           | 9   | 90 | 0  | 91  |
| CYP130      | 51                     | 48                           | 35  | 66 | 0  | 186 |
| CYP190      | 44                     | 54                           | 14  | 82 | 0  | 92  |
| CYP144      | 56                     | 33                           | 7   | 88 | 0  | 88  |
| CYP185      | 18                     | 84                           | 23  | 82 | 0  | 89  |
| CYP291      | 15                     | 0                            | 128 | 0  | 0  | 89  |
| CYP188      | 39                     | 66                           | 34  | 76 | 0  | 163 |
| CYP136      | 82                     | 61                           | 20  | 76 | 0  | 76  |
| CYP268      | 28                     | 61                           | 29  | 62 | 0  | 74  |
| CYP142      | 65                     | 99                           | 55  | 48 | 0  | 67  |
| CYP143      | 62                     | 66                           | 12  | 73 | 0  | 60  |
| CYP135      | 81                     | 51                           | 30  | 73 | 0  | 60  |
| CYP138      | 72                     | 44                           | 38  | 31 | 30 | 56  |
| CYP128      | 32                     | 0                            | 147 | 0  | 0  | 120 |
| CYP189      | 86                     | 42                           | 36  | 37 | 21 | 61  |
| CYP164      | 29                     | 58                           | 30  | 60 |    | 121 |
| CYP187      | 54                     | 37                           | 29  | 60 |    | 55  |
| CYP150      | 84                     | 43                           | 50  | 23 | 30 | 36  |
| CYP279      | 47                     | 42                           | 31  | 74 | 1  | 69  |
| CYP105      | 45                     | 41                           | 18  | 34 | 23 | 37  |
| CYP125      | 114                    | 43                           | 34  | 41 | 18 | 44  |



**Supplementary Table S8.** Amino acid conservation analysis in P450 families from different biological kingdoms. The conservation score (5-9) obtained *via* PROMALS3D is shown in the table where the number “9” indicates conserved amino acid in P450 members. P450 families were arranged in order of the highest to the lowest number of amino acids conserved.

| P450 family | Number of member P450s | Kingdom  | PROMALS3D conservation Index |     |     |    |     | Rank (highest to lowest conservation) |
|-------------|------------------------|----------|------------------------------|-----|-----|----|-----|---------------------------------------|
|             |                        |          | 5                            | 6   | 7   | 8  | 9   |                                       |
| CYP141      | 29                     | Bacteria | 0                            | 0   | 0   | 0  | 389 | 1                                     |
| CYP51       | 50                     | Bacteria | 11                           | 102 | 0   | 0  | 264 | 2                                     |
| CYP137      | 38                     | Bacteria | 145                          | 0   | 0   | 0  | 251 | 3                                     |
| CYP121      | 34                     | Bacteria | 0                            | 0   | 0   | 0  | 233 | 4                                     |
| CYP132      | 39                     | Bacteria | 175                          | 0   | 0   | 0  | 217 | 5                                     |
| CYP124      | 71                     | Bacteria | 52                           | 35  | 59  | 0  | 170 | 6                                     |
| CYP188      | 67                     | Bacteria | 62                           | 0   | 100 | 0  | 141 | 7                                     |
| CYP123      | 74                     | Bacteria | 62                           | 0   | 82  | 0  | 137 | 8                                     |
| CYP108      | 67                     | Bacteria | 52                           | 12  | 92  | 0  | 134 | 9                                     |
| CYP126      | 78                     | Bacteria | 65                           | 16  | 98  | 0  | 132 | 10                                    |
| CYP21       | 84                     | Animal   | 84                           | 30  | 104 | 0  | 126 | 11                                    |
| CYP139      | 54                     | Bacteria | 126                          | 0   | 0   | 0  | 116 | 12                                    |
| CYP291      | 23                     | Bacteria | 0                            | 111 | 0   | 0  | 115 | 13                                    |
| CYP142      | 90                     | Bacteria | 60                           | 6   | 83  | 0  | 112 | 14                                    |
| CYP501      | 106                    | Fungi    | 44                           | 60  | 113 | 0  | 106 | 15                                    |
| CYP128      | 49                     | Bacteria | 0                            | 132 | 0   | 0  | 106 | 15                                    |
| CYP164      | 50                     | Bacteria | 49                           | 9   | 94  | 0  | 99  | 16                                    |
| CYP130      | 98                     | Bacteria | 31                           | 31  | 91  | 0  | 93  | 17                                    |
| CYP73       | 155                    | Plant    | 52                           | 69  | 57  | 71 | 91  | 18                                    |
| CYP5        | 71                     | Animal   | 37                           | 48  | 117 | 0  | 89  | 19                                    |
| CYP116      | 93                     | Bacteria | 98                           | 92  | 39  | 55 | 89  | 19                                    |
| CYP195      | 52                     | Bacteria | 35                           | 38  | 54  | 21 | 89  | 19                                    |
| CYP24       | 65                     | Animal   | 87                           | 11  | 96  | 0  | 84  | 20                                    |
| CYP84       | 62                     | Plant    | 68                           | 64  | 48  | 44 | 80  | 21                                    |
| CYP98       | 77                     | Plant    | 68                           | 83  | 44  | 48 | 76  | 22                                    |
| CYP190      | 76                     | Bacteria | 34                           | 19  | 87  | 0  | 75  | 23                                    |
| CYP185      | 42                     | Bacteria | 65                           | 20  | 72  | 0  | 68  | 24                                    |
| CYP61       | 70                     | Fungi    | 54                           | 63  | 38  | 25 | 68  | 24                                    |
| CYP191      | 36                     | Bacteria | 92                           | 29  | 92  | 0  | 65  | 25                                    |
| CYP202      | 84                     | Bacteria | 34                           | 34  | 27  | 23 | 65  | 25                                    |
| CYP39       | 51                     | Animal   | 51                           | 47  | 79  | 0  | 64  | 26                                    |
| CYP78       | 112                    | Plant    | 40                           | 51  | 36  | 40 | 61  | 27                                    |
| CYP106      | 93                     | Bacteria | 38                           | 27  | 64  | 9  | 60  | 28                                    |

|         |     |          |    |    |    |    |    |    |
|---------|-----|----------|----|----|----|----|----|----|
| CYP28   | 51  | Animal   | 84 | 59 | 44 | 28 | 55 | 29 |
| CYP97   | 100 | Plant    | 37 | 49 | 29 | 25 | 55 | 29 |
| CYP17   | 99  | Animal   | 56 | 68 | 44 | 29 | 54 | 30 |
| CYP46   | 53  | Animal   | 53 | 42 | 99 | 0  | 54 | 30 |
| CYP279  | 71  | Bacteria | 38 | 49 | 26 | 37 | 54 | 30 |
| CYP19   | 176 | Animal   | 53 | 57 | 44 | 60 | 53 | 31 |
| CYP187  | 103 | Bacteria | 35 | 33 | 42 | 13 | 52 | 32 |
| CYP135  | 124 | Bacteria | 48 | 46 | 22 | 23 | 51 | 33 |
| CYP140  | 113 | Bacteria | 38 | 32 | 21 | 26 | 50 | 34 |
| CYP7    | 89  | Animal   | 69 | 43 | 34 | 26 | 50 | 34 |
| CYP144  | 107 | Bacteria | 45 | 33 | 34 | 35 | 47 | 35 |
| CYP26   | 131 | Animal   | 69 | 63 | 30 | 46 | 47 | 35 |
| CYP143  | 103 | Bacteria | 43 | 43 | 28 | 30 | 45 | 35 |
| CYP147  | 52  | Bacteria | 45 | 29 | 35 | 32 | 45 | 35 |
| CYP138  | 114 | Bacteria | 42 | 44 | 24 | 32 | 44 | 36 |
| CYP51   | 82  | Fungi    | 64 | 42 | 39 | 33 | 43 | 37 |
| CYP705  | 50  | Plant    | 66 | 49 | 41 | 28 | 43 | 37 |
| CYP33   | 67  | Animal   | 61 | 49 | 34 | 40 | 42 | 38 |
| CYP706  | 51  | Plant    | 53 | 49 | 34 | 32 | 42 | 39 |
| CYP86   | 139 | Plant    | 64 | 39 | 34 | 29 | 40 | 40 |
| CYP707  | 100 | Plant    | 59 | 54 | 47 | 57 | 40 | 40 |
| CYP714  | 58  | Plant    | 58 | 43 | 25 | 26 | 40 | 40 |
| CYP136  | 171 | Bacteria | 48 | 34 | 25 | 28 | 39 | 41 |
| CYP268  | 73  | Bacteria | 43 | 43 | 27 | 33 | 37 | 42 |
| CYP125  | 103 | Bacteria | 42 | 39 | 29 | 17 | 37 | 42 |
| CYP27   | 116 | Animal   | 66 | 46 | 25 | 25 | 37 | 42 |
| CYP150  | 164 | Bacteria | 59 | 45 | 20 | 35 | 36 | 43 |
| CYP8    | 91  | Animal   | 65 | 34 | 36 | 37 | 36 | 43 |
| CYP96   | 61  | Plant    | 57 | 40 | 29 | 30 | 35 | 44 |
| CYP11   | 171 | Animal   | 46 | 47 | 27 | 29 | 33 | 45 |
| CYP153  | 164 | Bacteria | 41 | 34 | 37 | 28 | 33 | 45 |
| CYP53   | 102 | Fungi    | 64 | 45 | 48 | 33 | 31 | 46 |
| CYP79   | 102 | Plant    | 67 | 55 | 30 | 31 | 31 | 46 |
| CYP90   | 117 | Plant    | 63 | 44 | 44 | 30 | 30 | 47 |
| CYP152  | 90  | Bacteria | 46 | 38 | 19 | 25 | 30 | 47 |
| CYP55   | 60  | Fungi    | 34 | 56 | 51 | 21 | 29 | 48 |
| CYP709  | 113 | Plant    | 50 | 42 | 18 | 26 | 29 | 48 |
| CYP189  | 188 | Bacteria | 54 | 37 | 17 | 27 | 28 | 49 |
| CYP704  | 109 | Plant    | 45 | 43 | 33 | 43 | 27 | 50 |
| CYP5152 | 66  | Fungi    | 46 | 28 | 25 | 15 | 26 | 51 |
| CYP12   | 119 | Animal   | 59 | 37 | 23 | 20 | 26 | 51 |
| CYP505  | 165 | Fungi    | 95 | 76 | 48 | 31 | 25 | 52 |
| CYP93   | 151 | Plant    | 68 | 42 | 26 | 20 | 24 | 53 |
| CYP58   | 106 | Fungi    | 52 | 43 | 29 | 21 | 23 | 54 |

|         |      |                                 |    |    |    |    |    |    |
|---------|------|---------------------------------|----|----|----|----|----|----|
| CYP75   | 251  | Plant                           | 74 | 48 | 31 | 29 | 23 | 54 |
| CYP584  | 96   | Fungi                           | 56 | 35 | 30 | 21 | 23 | 54 |
| CYP65   | 203  | Fungi                           | 38 | 25 | 13 | 11 | 22 | 55 |
| CYP72   | 208  | Plant                           | 57 | 27 | 28 | 27 | 20 | 56 |
| CYP89   | 134  | Plant                           | 48 | 38 | 28 | 25 | 20 | 56 |
| CYP52   | 161  | Fungi                           | 51 | 26 | 24 | 19 | 17 | 57 |
| CYP110  | 113  | Bacteria                        | 50 | 27 | 17 | 18 | 17 | 57 |
| CYP325  | 53   | Animal                          | 50 | 31 | 19 | 10 | 17 | 57 |
| CYP5035 | 129  | Fungi                           | 37 | 30 | 17 | 9  | 15 | 58 |
| CYP620  | 178  | Fungi                           | 33 | 21 | 12 | 17 | 15 | 58 |
| CYP102  | 333  | Bacteria                        | 45 | 43 | 16 | 19 | 14 | 59 |
| CYP63   | 133  | Fungi                           | 51 | 39 | 23 | 13 | 12 | 60 |
| CYP5139 | 181  | Fungi                           | 35 | 12 | 3  | 9  | 12 | 60 |
| CYP9    | 312  | Animal                          | 45 | 24 | 9  | 10 | 12 | 60 |
| CYP92   | 167  | Plant                           | 51 | 32 | 33 | 17 | 12 | 60 |
| CYP716  | 103  | Plant                           | 53 | 30 | 17 | 23 | 12 | 60 |
| CYP5136 | 68   | Fungi                           | 44 | 42 | 20 | 15 | 11 | 61 |
| CYP74   | 159  | Plant/Animal                    | 40 | 29 | 23 | 19 | 11 | 61 |
| CYP105  | 329  | Bacteria                        | 28 | 14 | 19 | 6  | 11 | 61 |
| CYP157  | 115  | Bacteria                        | 44 | 26 | 26 | 18 | 11 | 61 |
| CYP5150 | 336  | Fungi                           | 48 | 26 | 8  | 7  | 10 | 62 |
| CYP51   | 409  | Bacteria/fungi<br>/animal/plant | 36 | 19 | 11 | 13 | 10 | 62 |
| CYP94   | 170  | Plant                           | 39 | 44 | 34 | 26 | 10 | 62 |
| CYP1    | 289  | Animal                          | 67 | 28 | 26 | 24 | 9  | 63 |
| CYP3    | 248  | Animal                          | 59 | 44 | 27 | 20 | 9  | 63 |
| CYP5141 | 86   | Fungi                           | 40 | 21 | 13 | 11 | 8  | 64 |
| CYP512  | 247  | Fungi                           | 25 | 12 | 8  | 5  | 8  | 64 |
| CYP82   | 174  | Plant                           | 68 | 31 | 20 | 21 | 8  | 64 |
| CYP87   | 78   | Plant                           | 58 | 29 | 23 | 20 | 8  | 64 |
| CYP107  | 217  | Bacteria                        | 40 | 25 | 8  | 12 | 8  | 64 |
| CYP6    | 921  | Animal                          | 21 | 9  | 7  | 8  | 6  | 65 |
| CYP5037 | 261  | Fungi                           | 19 | 6  | 7  | 5  | 5  | 65 |
| CYP5144 | 514  | Fungi                           | 10 | 4  | 5  | 3  | 5  | 65 |
| CYP76   | 206  | Plant                           | 56 | 31 | 21 | 10 | 5  | 65 |
| CYP81   | 235  | Plant                           | 40 | 30 | 29 | 14 | 5  | 65 |
| CYP4    | 1076 | Animal                          | 27 | 11 | 5  | 6  | 4  | 66 |
| CYP2    | 857  | Animal                          | 48 | 18 | 10 | 9  | 3  | 67 |
| CYP71   | 780  | Plant                           | 22 | 7  | 6  | 5  | 3  | 67 |

**Supplementary Table S9.** Evolutionary rate analysis of P450 families. The maximum likelihood estimates for P450 evolutionary rates. Substitution pattern and rates were estimated under the Tamura-Nei model (+G)<sup>13</sup>. A discrete Gamma distribution was used to model evolutionary rate differences among sites. The rate of substitution for each site is drawn from a Gamma distribution with shape parameter  $\alpha$ . If  $\alpha$  is  $<1$ , the distribution implies that there is a relatively large amount of rate variation, with many sites evolving very slowly but some sites evolving at a high rate. For values of  $\alpha >1$ , the shape of the distribution changes qualitatively, with less variation and most sites having roughly similar rates<sup>14</sup>.

| <b>CYP family</b> | <b>Biological kingdom</b> | <b>Shape parameter (<math>\alpha</math>)</b> | <b>Ranking (highest to lowest rate of evolution)</b> |
|-------------------|---------------------------|----------------------------------------------|------------------------------------------------------|
| CYP505            | Fungi                     | 0.4034                                       | 1                                                    |
| CYP126            | Bacteria                  | 0.4646                                       | 2                                                    |
| CYP130            | Bacteria                  | 0.5066                                       | 3                                                    |
| CYP188            | Bacteria                  | 0.5089                                       | 4                                                    |
| CYP191            | Bacteria                  | 0.5125                                       | 5                                                    |
| CYP73             | Plant                     | 0.5186                                       | 6                                                    |
| CYP98             | Plant                     | 0.5341                                       | 7                                                    |
| CYP24             | Animal                    | 0.5525                                       | 8                                                    |
| CYP142            | Bacteria                  | 0.555                                        | 9                                                    |
| CYP501            | Fungi                     | 0.557                                        | 10                                                   |
| CYP195            | Bacteria                  | 0.5709                                       | 11                                                   |
| CYP26             | Animal                    | 0.5711                                       | 12                                                   |
| CYP97             | Plant                     | 0.5816                                       | 13                                                   |
| CYP19             | Animal                    | 0.5959                                       | 14                                                   |
| CYP55             | Fungi                     | 0.5982                                       | 15                                                   |
| CYP84             | Plant                     | 0.6002                                       | 16                                                   |
| CYP190            | Bacteria                  | 0.6028                                       | 17                                                   |
| CYP53             | Fungi                     | 0.6119                                       | 18                                                   |
| CYP116            | Bacteria                  | 0.6236                                       | 19                                                   |
| CYP78             | Plant                     | 0.6308                                       | 20                                                   |
| CYP63             | Fungi                     | 0.6371                                       | 21                                                   |
| CYP5144           | Fungi                     | 0.647                                        | 22                                                   |
| CYP153            | Bacteria                  | 0.6485                                       | 23                                                   |
| CYP202            | Bacteria                  | 0.654                                        | 24                                                   |
| CYP584            | Fungi                     | 0.654                                        | 24                                                   |
| CYP106            | Bacteria                  | 0.6603                                       | 25                                                   |
| CYP189            | Bacteria                  | 0.6673                                       | 26                                                   |
| CYP512            | Fungi                     | 0.6681                                       | 27                                                   |

|         |                                 |        |    |
|---------|---------------------------------|--------|----|
| CYP65   | Fungi                           | 0.6746 | 28 |
| CYP5150 | Fungi                           | 0.6756 | 29 |
| CYP164  | Bacteria                        | 0.6781 | 30 |
| CYP86   | Plant                           | 0.6854 | 31 |
| CYP125  | Bacteria                        | 0.6934 | 32 |
| CYP187  | Bacteria                        | 0.695  | 33 |
| CYP707  | Plant                           | 0.6989 | 34 |
| CYP75   | Plant                           | 0.7185 | 35 |
| CYP150  | Bacteria                        | 0.7188 | 36 |
| CYP144  | Bacteria                        | 0.7228 | 37 |
| CYP185  | Bacteria                        | 0.726  | 38 |
| CYP279  | Bacteria                        | 0.7342 | 39 |
| CYP143  | Bacteria                        | 0.7398 | 40 |
| CYP5141 | Fungi                           | 0.7465 | 41 |
| CYP136  | Bacteria                        | 0.7472 | 42 |
| CYP52   | Fungi                           | 0.7476 | 43 |
| CYP61   | Fungi                           | 0.7514 | 44 |
| CYP5136 | Fungi                           | 0.7543 | 45 |
| CYP6    | Animal                          | 0.7618 | 46 |
| CYP71   | Plant                           | 0.7618 | 46 |
| CYP33   | Animal                          | 0.763  | 47 |
| CYP5035 | Fungi                           | 0.7634 | 48 |
| CYP5152 | Fungi                           | 0.7641 | 49 |
| CYP110  | Bacteria                        | 0.7748 | 50 |
| CYP51   | Animal/Plant/<br>Bacteria/Fungi | 0.7794 | 51 |
| CYP27   | Animal                          | 0.7858 | 52 |
| CYP74   | Plant/Animal                    | 0.7879 | 53 |
| CYP108  | Bacteria                        | 0.7896 | 54 |
| CYP152  | Bacteria                        | 0.7904 | 55 |
| CYP12   | Animal                          | 0.7908 | 56 |
| CYP90   | Plant                           | 0.7922 | 57 |
| CYP147  | Bacteria                        | 0.794  | 58 |
| CYP58   | Fungi                           | 0.7948 | 59 |
| CYP135  | Bacteria                        | 0.7983 | 60 |
| CYP9    | Animal                          | 0.8016 | 61 |
| CYP268  | Bacteria                        | 0.8037 | 62 |
| CYP123  | Bacteria                        | 0.8084 | 63 |
| CYP17   | Animal                          | 0.8148 | 64 |
| CYP4    | Animal                          | 0.8196 | 65 |
| CYP5037 | Fungi                           | 0.8245 | 66 |
| CYP72   | Plant                           | 0.8262 | 67 |
| CYP5139 | Fungi                           | 0.8267 | 68 |
| CYP124  | Bacteria                        | 0.8361 | 69 |
| CYP706  | Plant                           | 0.8369 | 70 |

|        |          |        |     |
|--------|----------|--------|-----|
| CYP620 | Fungi    | 0.8391 | 71  |
| CYP138 | Bacteria | 0.8462 | 72  |
| CYP5   | Animal   | 0.8516 | 73  |
| CYP709 | Plant    | 0.8529 | 74  |
| CYP94  | Plant    | 0.8562 | 75  |
| CYP1   | Animal   | 0.8636 | 76  |
| CYP93  | Plant    | 0.8768 | 77  |
| CYP8   | Animal   | 0.8791 | 78  |
| CYP704 | Plant    | 0.8941 | 79  |
| CYP28  | Animal   | 0.8978 | 80  |
| CYP105 | Bacteria | 0.915  | 81  |
| CYP705 | Plant    | 0.9213 | 82  |
| CYP157 | Bacteria | 0.9259 | 83  |
| CYP325 | Animal   | 0.9344 | 84  |
| CYP716 | Plant    | 0.9416 | 85  |
| CYP140 | Bacteria | 0.9464 | 86  |
| CYP7   | Animal   | 0.9584 | 87  |
| CYP2   | Animal   | 0.9639 | 88  |
| CYP107 | Bacteria | 0.969  | 89  |
| CYP102 | Bacteria | 0.9767 | 90  |
| CYP46  | Animal   | 0.995  | 91  |
| CYP714 | Plant    | 1.0019 | 92  |
| CYP92  | Plant    | 1.0027 | 93  |
| CYP76  | Plant    | 1.0065 | 94  |
| CYP39  | Animal   | 1.0091 | 95  |
| CYP82  | Plant    | 1.0158 | 96  |
| CYP81  | Plant    | 1.0219 | 97  |
| CYP89  | Plant    | 1.0247 | 98  |
| CYP79  | Plant    | 1.0276 | 99  |
| CYP96  | Plant    | 1.053  | 100 |
| CYP21  | Animal   | 1.0927 | 101 |
| CYP121 | Bacteria | 1.2102 | 102 |
| CYP87  | Plant    | 1.2841 | 103 |
| CYP137 | Bacteria | 1.4553 | 104 |
| CYP291 | Bacteria | 1.5395 | 105 |
| CYP128 | Bacteria | 1.7168 | 106 |
| CYP132 | Bacteria | 1.7932 | 107 |
| CYP139 | Bacteria | 1.9896 | 108 |
| CYP3   | Animal   | 2.9595 | 109 |
| CYP11  | Animal   | 3.1065 | 110 |
| CYP141 | Bacteria | 3.2104 | 111 |

**Supplementary Table S10.** Clan-level classification of 113 P450 families belonging to different biological kingdoms such as bacteria, fungi, animal and plant. A hundred and thirteen P450 families were classified into different clans based on their phylogenetic relationships, as shown in Fig. 6, and following the procedure described elsewhere<sup>12</sup>.

| <b>Clan</b> | <b>CYP family</b>                                                                                                                                                                                              | <b>Biological kingdoms</b>     |
|-------------|----------------------------------------------------------------------------------------------------------------------------------------------------------------------------------------------------------------|--------------------------------|
| 1           | CYP71, CYP73, CYP75, CYP76, CYP78, CYP79, CYP81, CYP82, CYP84, CYP89, CYP92, CYP93, CYP98, CYP620, CYP705, CYP706, CYP5037, CYP5144, CYP5152                                                                   | Plant, Fungi                   |
| 2           | CYP7, CYP8, CYP19, CYP39                                                                                                                                                                                       | Animal                         |
| 3           | CYP11, CYP12, CYP24, CYP27                                                                                                                                                                                     | Animal                         |
| 4           | CYP26, CYP51, CYP53, CYP58, CYP61, CYP65, CYP87, CYP90, CYP110, CYP116, CYP135, CYP136, CYP137, CYP138, CYP501, CYP512, CYP707, CYP716, CYP5035                                                                | Animal, Fungi, Plant, Bacteria |
| 5           | CYP97, CYP132, CYP185                                                                                                                                                                                          | Plant, Bacteria                |
| 6           | CYP55, CYP74, CYP102, CYP105, CYP106, CYP141, CYP153, CYP505                                                                                                                                                   | Fungi, Plant, Animal, Bacteria |
| 7           | CYP46                                                                                                                                                                                                          | Animal                         |
| 8           | CYP157                                                                                                                                                                                                         | Bacteria                       |
| 9           | CYP101, CYP107, CYP108, CYP121, CYP123, CYP124, CYP125, CYP126, CYP128, CYP130, CYP140, CYP142, CYP144, CYP147, CYP150, CYP164, CYP187, CYP188, CYP189, CYP190, CYP191, CYP195, CYP202, CYP268, CYP279, CYP291 | Bacteria                       |
| 10          | CYP143                                                                                                                                                                                                         | Bacteria                       |
| 11          | CYP3, CYP5, CYP6, CYP9, CYP28, CYP5136, CYP5139, CYP5141, CYP5150                                                                                                                                              | Animal, Fungi                  |
| 12          | CYP72, CYP709, CYP714                                                                                                                                                                                          | Plant                          |

|    |                                                      |                  |
|----|------------------------------------------------------|------------------|
| 13 | CYP4, CYP325                                         | Animal           |
| 14 | CYP52, CYP63, CYP86, CYP94, CYP96, CYP584,<br>CYP704 | Plant, Fungi     |
| 15 | CYP1, CYP2, CYP17, CYP21, CYP33, CYP139,<br>CYP152   | Animal, Bacteria |



**Supplementary Table S11.** Family-level functional analysis of P450s. P450s known for their major role (majority of member P450s function) is shown in the table.

| Clan     | CYP family | Broader biological/functional role                                                                                                                                                                                                  | Biological kingdoms | References |
|----------|------------|-------------------------------------------------------------------------------------------------------------------------------------------------------------------------------------------------------------------------------------|---------------------|------------|
| <b>1</b> | CYP71      | Synthesis of indole aldoxime (hormones) -terpenoid metabolism                                                                                                                                                                       | Plant, Fungi        | 15         |
|          | CYP73      | Biosynthesis of lignin (Cinnamic acid hydroxylation)                                                                                                                                                                                |                     | 16-18      |
|          | CYP75      | Biosynthesis of lignin (Flavonoid hydroxylation)                                                                                                                                                                                    |                     | 19         |
|          | CYP76      | Terpenoid metabolism; biosynthesis of secoiridoids and terpene indole alkaloids; herbicide metabolism; 7-ethoxycoumarin O-de-ethylation (hydroxylation of geraniol and its derivatives, monoterpenes and diterpenes and phenylurea) |                     | 20,21      |
|          | CYP78      | Fatty acid hydroxylation; growth and gametophore formation                                                                                                                                                                          |                     | 22-24      |
|          | CYP79      | Synthesis of indole aldoxime (hormones)                                                                                                                                                                                             |                     | 25,26      |
|          | CYP81      | Indole glucosinolates hydroxylation                                                                                                                                                                                                 |                     | 27         |
|          | CYP82      | Terpenoid metabolism                                                                                                                                                                                                                |                     | 27         |
|          | CYP84      | Biosynthesis of lignin (coniferaldehyde/coniferyl alcohol 5-hydroxylase)                                                                                                                                                            |                     | 29, 30     |
|          | CYP89      | Formation of major chlorophyll catabolites during leaf senescence                                                                                                                                                                   |                     | 31         |
|          | CYP92      | Brassinosteroid synthesis                                                                                                                                                                                                           |                     | 32         |
|          | CYP93      | Flavonoid biosynthesis                                                                                                                                                                                                              |                     | 33         |
|          | CYP98      | Biosynthesis of lignin (3'-hydroxylation of phenolic esters p-coumaroyltyramine meta-hydroxylation)                                                                                                                                 |                     | 16         |
|          | CYP620     | Orphan                                                                                                                                                                                                                              |                     |            |
|          | CYP705     | Sterols desaturation and triterpenoid metabolism                                                                                                                                                                                    |                     | 16, 30     |
|          | CYP706     | Sesquiterpenoid synthesis (nootkatol and nootkatone)                                                                                                                                                                                |                     | 34         |
|          | CYP5037    | Plant defence chemicals and degradation of compounds derived from plant components (lignin, cellulose or hemicellulose; coumarin)                                                                                                   |                     | 10, 35, 36 |
|          | CYP5144    | Polycyclic aromatic hydrocarbons and plant defence chemicals and degradation of compounds derived from plant components (lignin, cellulose or hemicellulose)                                                                        |                     | 10, 35, 36 |
|          | CYP5152    | Plant defence chemicals and degradation of compounds derived from plant components (lignin, cellulose or hemicellulose)                                                                                                             |                     | 10, 35, 36 |

|          |          |                                                                                        |                                             |                 |
|----------|----------|----------------------------------------------------------------------------------------|---------------------------------------------|-----------------|
| <b>2</b> | CYP7     | Steroids hydroxylation (bile acid biosynthesis -cholesterol 7 $\alpha$ -hydroxylation) | Animal                                      | 37,38           |
|          | CYP8     | Steroids hydroxylation (Prostacyclin and bile acid biosynthesis)                       |                                             | 38,39           |
|          | CYP19    | Steroids (aromatase: aromatization of androgens into estrogens)                        |                                             | 38, 40          |
|          | CYP39    | Steroids hydroxylation (cholesterol hydroxylation; Steroid 7-alpha hydroxylase)        |                                             | 38              |
| <b>3</b> | CYP11    | Steroids hydroxylation (steroids biosynthesis)                                         | Animal                                      | 38              |
|          | CYP12    | Insecticide resistance                                                                 |                                             | 41              |
|          | CYP24    | Steroids hydroxylation (vitamin D)                                                     |                                             | 38              |
|          | CYP27    | Steroids hydroxylation (bile acid biosynthesis and viamin D)                           |                                             | 38              |
| <b>4</b> | CYP26    | Retinoic acid hydroxylation (Vitamin A)                                                | Animal, Fungi,<br>Plant, Bacteria           | 38              |
|          | CYP51    | Steroid metabolism (biosynthesis of membrane ergosterol)                               |                                             | 42              |
|          | CYP53    | Benzoate and its derivatives hydroxylation; plant material stilbene demethylation      |                                             | 10, 35, 36      |
|          | CYP58    | Mycotoxin biosynthesis (Aflatoxin and trichothecene)                                   |                                             | 43              |
|          | CYP61    | Steroid metabolism (biosynthesis of membrane ergosterol)                               |                                             | 44              |
|          | CYP65    | Mycotoxin biosynthesis (Trichothecene and fumonisin)                                   |                                             | 45-47           |
|          | CYP87    | Triterpoid biosynthesis (Maesasaponins - C-16 $\alpha$ oxidations of $\beta$ -amyirin) |                                             | 48              |
|          | CYP90    | Steroid hydroxylation (Brassinosteroids)                                               |                                             | 49              |
|          | CYP110   | Fatty acid $\omega$ -hydroxylase                                                       |                                             | 50              |
|          | CYP116   | Xenobiotics degradation                                                                |                                             | 51, 52          |
|          | CYP135   | Orphan                                                                                 |                                             |                 |
|          | CYP136   | Orphan (up-regulated by hydrocarbons)                                                  |                                             |                 |
|          | CYP137   | Orphan                                                                                 |                                             |                 |
|          | CYP138   | Orphan                                                                                 |                                             |                 |
|          | CYP501   | Orphan                                                                                 |                                             |                 |
|          | CYP512   | Steroids hydroxylation (progesterone and testosterone and dehydroabiatic acid)         |                                             | 10, 35, 36      |
|          | CYP707   | Hormones hydroxylaiton (Abscisic acid - plants)                                        |                                             | 53              |
|          | CYP716   | Triterpoid biosynthesis (Maesasaponins - oxidation of b-amyirin to oleanolic acid)     |                                             | 48              |
|          | CYP5035  | Plant chemicals, i.e. resin and flavonoids and the pharmaceutical chemical naproxen    |                                             | 10, 35, 36      |
|          | <b>5</b> | CYP97                                                                                  | Tetraterpenoids hydroxylaiton (carotenoids) | Plant, Bacteria |

|          |        |                                                                                                                                             |                                   |        |
|----------|--------|---------------------------------------------------------------------------------------------------------------------------------------------|-----------------------------------|--------|
|          | CYP132 | Orphan                                                                                                                                      |                                   |        |
|          | CYP185 | Orphan (up-regulated by hydrocarbons)                                                                                                       |                                   |        |
| <b>6</b> | CYP55  | Denitrification                                                                                                                             | Fungi, Plant,<br>Animal, Bacteria | 55     |
|          | CYP74  | Conversions of fatty acid hydroperoxides to bioactive oxylipins                                                                             |                                   | 56, 57 |
|          | CYP102 | Fatty acid hydroxylation                                                                                                                    |                                   | 58     |
|          | CYP105 | Diterpenoids oxidation (abietic acid, dehydroabietic acid, isopimaric acid);<br>Biosynthesis of drugs-antibiotics                           |                                   | 59     |
|          | CYP106 | Steroids, di- and triterpene hydroxylation (progesterone, 11-deoxycortisol;<br>dehydroepiandrosterone; 11-keto- $\beta$ -boswellic acid)    |                                   | 60     |
|          | CYP141 | Orphan                                                                                                                                      |                                   |        |
|          | CYP153 | Alkane hydroxylation                                                                                                                        |                                   | 61     |
|          | CYP505 | Fatty acid hydroxylation and mycotoxin biosynthesis (fumonisin)                                                                             |                                   | 62     |
| <b>7</b> | CYP46  | Steroids hydroxylation (cholesterol)                                                                                                        | Animal                            | 38, 63 |
| <b>8</b> | CYP157 | Orphan (no EXXR)                                                                                                                            | Bacteria                          | 64     |
| <b>9</b> | CYP101 | Terpenoid hydroxylaiton (camphor)                                                                                                           | Bacteria                          | 65     |
|          | CYP107 | Macrolide hydroxylation (antibiotics/drugs), fatty acids oxidative cleavage, steroid<br>hydroxylation (vitamin D3)                          |                                   | 66-68  |
|          | CYP108 | Terpineol oxidation                                                                                                                         |                                   | 69     |
|          | CYP121 | Mycocyclosin production via intramolecular C-C bond formation of cyclo (L-tyr-L-<br>tyr) (cYY)-highly specific                              |                                   | 70     |
|          | CYP123 | Orphan                                                                                                                                      |                                   |        |
|          | CYP124 | Steroids and fatty acids hydroxylation (Omega hydroxylation of methyl-branched<br>fatty acids and cholesterol/cholest-4-en-3-one oxidation) |                                   | 71, 72 |
|          | CYP125 | Steroids hydroxylation ( cholesterol and 4-cholesten-3-one oxidation)                                                                       |                                   | 73     |
|          | CYP126 | Orphan                                                                                                                                      |                                   |        |
|          | CYP128 | Menaquinone hydroxylaiton (prediction)                                                                                                      |                                   | 74     |
|          | CYP130 | Orphan                                                                                                                                      |                                   |        |
|          | CYP140 | Macrolide hydroxylation (mycolactone synthesis)                                                                                             |                                   | 75     |
|          | CYP142 | Steroid hydroxylation ( cholesterol and 4-cholesten-3-one oxidation)                                                                        |                                   | 76     |

|           |         |                                                                                                                        |               |            |
|-----------|---------|------------------------------------------------------------------------------------------------------------------------|---------------|------------|
|           | CYP144  | Orphan                                                                                                                 |               |            |
|           | CYP147  | Omega-fatty acid hydroxylation                                                                                         |               | 77         |
|           | CYP150  | polycyclic aromatic hydrocarbon hydroxylation (pyrene, dibenzothiophene and 7-methylbenz(alpha)anthracene)             |               | 78         |
|           | CYP164  | Fatty acid hydroxylation                                                                                               |               | 79         |
|           | CYP187  | Orphan                                                                                                                 |               |            |
|           | CYP188  | Orphan                                                                                                                 |               |            |
|           | CYP189  | Orphan                                                                                                                 |               |            |
|           | CYP190  | Orphan                                                                                                                 |               |            |
|           | CYP191  | Orphan                                                                                                                 |               |            |
|           | CYP195  | Orphan                                                                                                                 |               |            |
|           | CYP202  | Orphan                                                                                                                 |               |            |
|           | CYP268  | Orphan                                                                                                                 |               |            |
|           | CYP279  | Orphan                                                                                                                 |               |            |
|           | CYP291  | Orphan                                                                                                                 |               |            |
| <b>10</b> | CYP143  | Orphan                                                                                                                 | Bacteria      |            |
| <b>11</b> | CYP3    | Drug/Xenobiotic metabolism                                                                                             | Animal, Fungi | 38         |
|           | CYP5    | Eicosanoids hydroxylation (Thromboxane A2 synthesis)                                                                   |               | 38         |
|           | CYP6    | Xenobiotic metabolism (fatty acids, insecticides), plant chemicals (furanocoumarins)                                   |               | 80         |
|           | CYP9    | Monoterpene conversion into pheromones, xenobiotics                                                                    |               | 80         |
|           | CYP28   | Orphan                                                                                                                 |               |            |
|           | CYP5136 | Xenobiotics degradation (Polycyclic aromatic and alkylphenols hydroxylation)                                           |               | 10, 35, 36 |
|           | CYP5139 | Xenobiotics degradation (7-ethoxycoumarin; carbazole and phenanthrene)                                                 |               | 10, 35, 36 |
|           | CYP5141 | Plant defense chemicals or degradation of compounds derived from plant components (lignin, cellulose or hemicellulose) |               | 10, 35, 36 |
|           | CYP5150 | Xenobiotics degradation (Polycyclic aromatic compounds)                                                                |               | 10, 35, 36 |
| <b>12</b> | CYP72   | Steroid catabolism (Brassinosteroids)                                                                                  | Plant         | 81         |
|           | CYP709  | Fatty acid hydroxylation                                                                                               |               | 82         |
|           | CYP714  | Diterpene hydroxylation (Gibberellins)                                                                                 |               | 30         |

|           |        |                                                                                   |                  |       |
|-----------|--------|-----------------------------------------------------------------------------------|------------------|-------|
| <b>13</b> | CYP4   | Arachidonic acid and fatty acid hydroxylation; insecticide resistance             | Animal           | 38    |
|           | CYP325 | Insecticide resistance (based on up-regulation)                                   |                  | 83,84 |
| <b>14</b> | CYP52  | Alkanes and fatty acid hydroxylation                                              | Plant, Fungi     | 85,86 |
|           | CYP63  | Xenobiotics degradation (alkanes, polycyclic aromatic compounds and alkylphenols) |                  | 87    |
|           | CYP86  | Fatty acid hydroxylation                                                          |                  | 38    |
|           | CYP94  | Fatty acid hydroxylation                                                          |                  | 38    |
|           | CYP96  | Alkane hydroxylation                                                              |                  | 88    |
|           | CYP584 | Orphan                                                                            |                  |       |
|           | CYP704 | Fatty acid hydroxylation                                                          |                  | 89    |
| <b>15</b> | CYP1   | Drug/xenobiotic metabolism; Steroids hydroxylation                                | Animal, Bacteria | 38,90 |
|           | CYP2   | Drug/xenobiotic and steroid metabolism; Fatty acids hydroxylation                 |                  | 38,90 |
|           | CYP17  | Steroid biosynthesis (testosterone and estrogen biosynthesis)                     |                  | 38,90 |
|           | CYP21  | Steroid biosynthesis                                                              |                  | 38,90 |
|           | CYP33  | Orphan                                                                            |                  |       |
|           | CYP139 | Orphan                                                                            |                  |       |
|           | CYP152 | Fatty acid hydroxylation                                                          |                  | 91    |

**Supplementary Table S12.** Classification of P450s based on their main substrate class as described elsewhere (38). Percent of P450s is calculated considering 75 P450s that are functionally characterized as 100% for each of the substrate class. Considering study is aimed to find common functions of all P450s and many P450s are involved in oxidation of different class of xenobiotics, xenobiotics as substrate class data is not represented. This table is derived from the functional data presented in Table S11.

| Substrate class     | P450s                                                                                                                                   | Number of P450s | Percent of P450s |
|---------------------|-----------------------------------------------------------------------------------------------------------------------------------------|-----------------|------------------|
| Terpenes            | CYP714,CYP9,CYP108,CYP101,CYP106,CYP105,CYP97,CYP716,CYP87,CYP706,CYP705,CYP82,CYP81,CYP79,CYP76,CYP71                                  | 16              | 21               |
| Lignin constituents | CYP5141,CYP5139,CYP5152,CYP5144,CYP5037,CYP98,CYP84,CYP76,CYP73                                                                         | 9               | 12               |
| Fatty acids         | CYP152,CYP2,CYP704,CYP94,CYP86,CYP63,CYP52,CYP4,CYP709,CYP6,CYP164,CYP147,CYP124,CYP107,CYP505,CYP102,CYP74,CYP110,CYP78                | 19              | 25               |
| Steroids            | CYP121,CYP17,CYP2,CYP72,CYP142,CYP125,CYP124,CYP46,CYP106,CYP512,CYP90,CYP61,CYP51,CYP27,CYP11,CYP39,CYP19,CYP8,CYP7,CYP705,CYP92,CYP76 | 22              | 29               |
| Alkanes             | CYP96,CYP52,CYP153                                                                                                                      | 3               | 4                |
| Vitamins            | CYP107,CYP26,CYP27,CYP24                                                                                                                | 4               | 5                |
| Eicosanoids         | CYP4, CYP5                                                                                                                              | 2               | 3                |

## REFERENCES

1. Reddy, T. B. et al. TB database: an integrated platform for tuberculosis research. *Nucleic Acids Res.* **37**, D499-508 (2009).
2. Galagan, J. E. et al. TB database 2010: overview and update. *Tuberculosis (Edinb)* **90**, 225-235 (2010).
3. Kanehisa, M. & Goto, S. KEGG: kyoto encyclopedia of genes and genomes. *Nucleic Acids Res.* **28**, 27-30 (2000).
4. Kanehisa, M., Sato, Y., Kawashima, M., Furumichi, M. & Tanabe, M. KEGG as a reference resource for gene and protein annotation. *Nucleic Acids Res.* **44**, D457-D462 (2016).
5. The UniProt Consortium. UniProt: a hub for protein information. *Nucleic Acids Res.* **43**, D204-D212 (2015).
6. Tortoli, E. Phylogeny of the genus *Mycobacterium*: Many doubts, few certainties. *Infect Genet Evol* **12**, 827-831.
7. Nelson, D. R. The cytochrome P450 homepage. *Human Genomics* **4**, 59–65 (2009).
8. Syed, K, Nelson, D. R., Riley, R. & Yadav, J. S. Genome-wide annotation and comparative genomics of cytochrome P450 monooxygenases (P450s) in the polypore species *Bjerkandera adusta*, *Ganoderma* sp. and *Phlebia brevispora*. *Mycologia* **105**, 1445-1455 (2013).
9. Kgosiemang, I. K. R., Mashele, S. S. & Syed, K. Comparative genomics and evolutionary analysis of cytochrome P450 monooxygenases in fungal subphylum Saccharomycotina. *J. Pure Appl. Microbiol.* **8**, 291-302 (2014).
10. Syed, K., Shale, K., Pagadala, N. S. & Tuszynski, J. Systematic identification and evolutionary analysis of catalytically versatile cytochrome P450 monooxygenase families enriched in model basidiomycete fungi. *PLoS ONE* **9**(1), e86683 (2014).
11. Sello, M. M. et al. Diversity and evolution of cytochrome P450 monooxygenases in Oomycetes. *Scientific Reports* **5**, 11572 (2015).
12. Chen, W. et al. Fungal cytochrome P450 monooxygenases: Their distribution, structure, functions, family expansion, and evolutionary origin. *Genome Biol. Evol.* **6**, 1620–34 (2014).
13. Tamura, K. & Nei, M. Estimation of the number of nucleotide substitutions in the control region of mitochondrial DNA in humans and chimpanzees. *Mol. Biol. Evol.* **10**, 512-526 (1993).
14. Liò, P. & Goldman, N. Models of molecular evolution and phylogeny. *Genome Res.* **8**, 1233-1244 (1998).
15. Nafisi, M. et al. *Arabidopsis* cytochrome P450 monooxygenase 71A13 catalyzes the conversion of indole-3-acetaldoxime in camalexin synthesis. *Plant Cell.* **19**, 2039-2052 (2007).
16. Hamberger, B. & Bak, S. Plant P450s as versatile drivers for evolution of species-specific chemical diversity. *Phil. Trans. R. Soc. B. Biol. Sci.* **368**, 20120426 (2013).

17. Teutsch, H. G. Isolation and sequence of a cDNA encoding the Jerusalem artichoke cinnamate 4-hydroxylase, a major plant cytochrome P450 involved in the general phenylpropanoid pathway. *Proc. Natl. Acad. Sci. U. S. A.* **90**, 4102-6 (1993).
18. Pierrel, M. A. et al. 1994. Catalytic properties of the plant cytochrome P450 CYP73 expressed in yeast. Substrate specificity of cinnamate hydroxylase. *Eur. J. Biochem.* **224**, 835-844.
19. Kaltenbach, M., Schröder, G., Schmelzer, E., Lutz, V. & Schröder J. Flavonoid hydroxylase from *Catharanthus roseus*: cDNA, heterologous expression, enzyme properties and cell-type specific expression in plants. *Plant J.* **19**, 183-193.
20. Höfer, R. et al. Dual function of the cytochrome P450 CYP76 family from *Arabidopsis thaliana* in the metabolism of monoterpenols and phenylurea herbicides. *Plant Physiol.* **166**, 1149-61 (2014).
21. Batard, Y. et al. Molecular cloning and functional expression in yeast of CYP76B1, a xenobiotic-inducible 7-ethoxycoumarin O-de-ethylase from *Helianthus tuberosus*. *Plant J.* **14**, 111-120 (1998).
22. Katsumata, T. et al. Involvement of the CYP78A subfamily of cytochrome P450 monooxygenases in protonema growth and gametophore formation in the moss *Physcomitrella patens*. *Biosci. Biotechnol. Biochem.* **75**, 331-336 (2011).
23. Imaishi, H., Matsuo, S., Swai, E. & Ohkawa, H. CYP78A1 preferentially expressed in developing inflorescences of *Zea mays* encoded a cytochrome P450-dependent lauric acid 12-monooxygenase. *Biosci. Biotechnol. Biochem.* **64**, 1696-1701 (2000).
24. Kai, K. et al. Metabolomics for the characterization of cytochromes P450-dependent fatty acid hydroxylation reactions in *Arabidopsis*. *Plant Biotechnol.* **26**, 175-182 (2009).
25. Sugawara, S. et al. Biochemical analyses of indole-3-acetaldoxime-dependent auxin biosynthesis in *Arabidopsis*. *Proc. Natl. Acad. Sci. U. S. A.* **106**, 5430-5435 (2009).
26. Irmisch, S., Zeltner, P., Handrick, V., Gershenzon, J. & Kollner, T. G. The maize cytochrome P450 CYP79A61 produces phenylacetaldoxime and indole-3-acetaldoxime in heterologous systems and might contribute to plant defense and auxin formation. *BMC Plant Biology* **15**, 128 (2015).
27. Pfalz, M. et al. Metabolic engineering in *Nicotiana benthamiana* reveals key enzyme functions in *Arabidopsis* indole glucosinolate modification. *Plant Cell* **23**, 716-729.
28. Lee, S. et al. Herbivore-induced and floral homoterpene volatiles are biosynthesized by a single P450 enzyme (CYP82G1) in *Arabidopsis*. *Proc. Natl. Acad. Sci. U.S.A.* **107**, 21205–21210 (2010).
29. Ehrling, J., Hamberger, B., Million-Rousseau, R. & Werck-Reichhart, D. Cytochromes P450 in phenolic metabolism. *Phytochem. Rev.* **5**, 239-270 (2006).
30. Mizutani, M. & Ohta, D. Diversification of P450 genes during land plant evolution. *Annu. Rev. Plant Biol.* **61**, 291-315 (2010).
31. Christ, B. et al. Cytochrome P450 CYP89A9 is Involved in the Formation of Major Chlorophyll Catabolites during Leaf Senescence in *Arabidopsis*. *Plant Cell* **25**, 1868-1880.
32. Kang, J.G. et al. (2001). Light and brassinosteroid signals are integrated via a dark-induced small G protein in etiolated seedling growth. *Cell* **105**, 625–636 (2011).



33. Du, Y., Chu, H., Chu, I. K. & Lo, C. CYP93G2 is a flavone 2-hydroxylase required for c-glycosylflavone biosynthesis in Rice. *Plant Physiol.* **154**, 324-333 (2010).
34. Cankar, K. et al. Valencene oxidase CYP706M1 from Alaska cedar (*Callitropsis nootkatensis*). *FEBS Lett.* 588, 1001-1007 (2014).
35. Ide, M., Ichinose, H. & Wariishi, H. Molecular identification and functional characterization of cytochrome P450 monooxygenases from the brown-rot basidiomycete *Postia placenta*. *Arch. Microbiol.* **194**, 243–53 (2012).
36. Hirose, S. et al. Insight into functional diversity of cytochrome P450 in the white-rot basidiomycete *Phanerochaete chrysosporium*: Involvement of versatile monooxygenase. *Biochem. Biophys. Res. Commun.* **407**, 118–23 (2011).
37. Cohen, J. C. et al. Cloning of the human cholesterol 7 alpha-hydroxylase gene (CYP7) and localization to chromosome 8q11-q12. *Genomics* **14**, 153-61 (1992).
38. Guengerich, F. P. Human cytochrome P450 enzymes in *Cytochrome P450: Structure, mechanism, and biochemistry* 4<sup>th</sup> edn, (eds Ortiz de Montellano, P. R.) Ch. 9, 523-786. (Springer International Publishing , 2015).
39. Yokoyama, C. et al. Human gene encoding prostacyclin synthase (PTGIS): genomic organization, chromosomal localization, and promoter activity. *Genomics* **36**, 296-304 (1996).
40. Corbin, C. J. et al. Isolation of a full-length cDNA insert encoding human aromatase system cytochrome P-450 and its expression in nonsteroidogenic cells. *Proc. Natl. Acad. Sci. U.S.A.* **85**, 8948-8952 (1988).
41. Feyereisen, R. Evolution of insect P450. *Biochem. Soc. Transc.* **34**, 6 (2006).
42. Kelly, S. L. & Kelly, D. E. Microbial cytochrome P450: Biodiversity and biotechnology, where do cytochrome P450 come from, what do they do and what can they do for us? *Phil. Trans. R. Soc. B. Biol. Sci.* **368**, 161220120430 (2013).
43. Ehrlich, K. C., Chang, P. K., Yu, J. & Cotty, P. J. Aflatoxin biosynthesis cluster gene *cypA* is required for G-aflatoxin formation. *Appl. Environ. Microbiol.* **70**, 6518-6524 (2004).
44. Kelly, S. L., Lamb, D. C., Baldwin, B. C., Corran, A. J. & Kelly, D. E. Characterization of *Saccharomyces cerevisiae* CYP61, sterol delta22-desaturase, and inhibition by azole antifungal agents. *J. Biol. Chem.* **272**, 9986-8 (1997).
45. Kimura, M., Tokai, T., Takahashi-Ando, N., Ohsato, S. & Fujimura, M. (2007). Molecular and genetic studies of trichothecene biosynthesis: pathways, genes, and evolution. *Biosci. Biotechnol. Biochem.* **71**, 2105– 2123 (2007).
46. Proctor, R. H., Plattner, R. D., Desjardins, A. E., Busman, M. & Butchko, R. A. (2006). Fumonisin production in the maize pathogen *Fusarium verticillioides*: genetic basis of naturally occurring chemical variation. *J. Agric. Food. Chem.* **54**, 2424-2430 (2006).
47. Bojja, R. S., Cerny, R. L., Proctor, R. H. & Du, L. Determining the biosynthetic sequence in the early steps of the fumonisin pathway by use of three gene-disruption mutants of *Fusarium verticillioides*. *J. Agric. Food. Chem.* **52**, 2855-2860 (2004).
48. Moses, T. et al. Unravelling the triterpenoid Saponin biosynthesis of the African shrub *Maesa lanceolata*. *Mol. Plant* **8**, 122-135 (2015).

49. Szekeres, M. Brassinosteroids rescue the deficiency of CYP90, a cytochrome P450, controlling cell elongation and de-etiolation in *Arabidopsis*. *Cell* **85**, 171-182 (1996).
50. Torres, S., Fjetland, C. R. & Lammers, P. J. Alkane-induced expression, substrate binding profile, and immunolocalization of a cytochrome P450 encoded on the *nifD* excision element of *Anabaena* 7120. *BMC Microbiol.* **5**, 16 (2005).
51. Nagy, I. Degradation of the thiocarbamate herbicide EPTC (S-ethyl dipropylcarbamothioate) and biosafening by *Rhodococcus* sp. strain NI86/21 involve an inducible cytochrome P-450 system and aldehyde dehydrogenase. *J. Bacteriol.* **177**, 676-687.
52. Warman, A. J. et al. Characterization of *Cupriavidus metallidurans* CYP116B1 – a thiocarbamate herbicide oxygenating P450-phthalate dioxygenase reductase fusion protein. *FEBS J.* **279**, 1675-1693 (2012).
53. Saito, S. et al. Arabidopsis CYP707As encode (+)-abscisic acid 8'-hydroxylase, a key enzyme in the oxidative catabolism of abscisic acid. *Plant Physiology* **134**, 1439-1449 (2004).
54. Ruiz-Sola, M. A. & Rodriguez-Concepcion, M. Carotenoid biosynthesis in *Arabidopsis*: A colourful pathway. *Arabidopsis Book* **10**, e0158 (2012).
55. Tomura, D., Obika, K., Fukumizu, A. & Shoun, H. Nitric oxide reductase cytochrome P-450 gene, CYP 55, of the fungus *Fusarium oxysporum* containing a potential binding-site for FNR, the transcription factor involved in the regulation of anaerobic growth of *Escherichia coli*. *J Biochem.* **116**, 88-94.
56. Stumpe, M. & Feussner, I. Formation of oxylipins by CYP74 enzymes. *Phytochem. Rev.* **5**, 347-357 (2006).
57. Grechkin, A. N. Hydroperoxide lyase and divinyl ether synthase. *Prostaglandins Other Lipid Mediat.* **68-69**, 457-470 (2002).
58. Noble, M. A., Miles, C. S., Reid, G. A., Chapman, S. K. & Munro, A. W. Catalytic properties of key active site mutants of flavocytochrome P-450 BM3. *Biochem. Soc. Trans.* **27**, A44–A44 (1999).
59. Moody, S .C. & Loveridge, E. J. CYP105-diverse structures, functions and roles in an intriguing family of enzymes in *Streptomyces*. *J. Appl. Microbiol.* **117**, 1549-1563.
60. Kiss, F. M. et al. Comparison of CYP106A1 and CYP106A2 from *Bacillus megaterium*-identification of a novel 11-oxidase activity. *Appl. Microbiol. Biotechnol.* **99**, 8495-8514.
61. Maier, T., Foerster, H.-H., Asperger, O. & Hahn, U. Molecular characterization of the 56-kDa CYP153 from *Acinetobacter* sp. EB104. *Biochem. Biophys. Res. Commun.* **286**, 652-658 (2001).
62. Kitazume, T., Takaya, N., Nakayama, N. & Shoun, H. *Fusarium oxysporum* fatty-acid subterminal hydroxylase (CYP505) is a membrane-bound eukaryotic counterpart of *Bacillus megaterium* cytochrome P450BM3. *J. Biol. Chem.* **275**, 39734-40 (2000).
63. Lund, E. G., Guileyardo, J. M., Russell, D. W. cDNA cloning of cholesterol 24-hydroxylase, a mediator of cholesterol homeostasis in the brain. *Proc. Natl. Acad. Sci. U. S. A.* **96**, 7238-7243.

64. Rupasinghe, S. et al. The cytochrome P450 gene family CYP157 does not contain EXXR in the K-helix reducing the absolute conserved P450 residues to a single cysteine. *FEBS Lett.* **580**, 6338-6342 (2006).
65. Poulos, T. L., Finzel, B. C. & Howard, A. J. Crystal structure of substrate-free *Pseudomonas putida* cytochrome P450. *Biochemistry* **25**, 5314–5322 (1986).
66. Cupp–Vickery, J. R. & Poulos, T. L. Structure of cytochrome P450eryF involved in erythromycin biosynthesis. *Nat. Struct. Biol.* **2**, 144-153 (1995).
67. Sakaki, T. et al. Bioconversion of vitamin D to its active form by bacterial or mammalian cytochrome P450. *Biochim. Biophys. Acta.* **1814**, 249-256 (2011).
68. Cryle, M. J. & De Voss, J. J. Carbon-carbon bond cleavage by cytochrome P450(boil) (CYP107H1). *Chem. Commun.* **1**, 86-87 (2004).
69. Fruetel, J. A., Mackman, R. L., Peterson, J. A. & Ortiz de Montellano, P. R. Relationship of active site topology to substrate specificity for cytochrome P450terp (CYP108). *J. Biol. Chem.* **269**, 28815-28821 (1994).
70. McLean, K. J. et al. (2008). Characterization of active site structure in CYP121. A cytochrome P450 essential for viability of *Mycobacterium tuberculosis* H37Rv. *J. Biol. Chem.* **283**, 33406-33416 (2008).
71. Johnston, J. B., Kells, P. M., Podust, L. M. & Ortiz de Montellano, P. R. Biochemical and structural characterization of CYP124: a methyl-branched lipid  $\omega$ -hydroxylase from *Mycobacterium tuberculosis*. *Proc. Natl. Acad. Sci. U.S.A.* **106**, 20687-20692 (2009).
72. Johnston, J.B., Ouellet, H. & Ortiz de Montellano, P. R. Functional redundancy of steroid C-26-monooxygenase activity in *Mycobacterium tuberculosis* revealed by biochemical and genetic analyses. *J. Biol. Chem.* **285**, 36352–36360 (2010).
73. McLean, K. J. et al. The structure of *Mycobacterium tuberculosis* CYP125 molecular basis for cholesterol binding in a P450 needed for host infection. *J. Biol. Chem.* **284**, 35524–35533 (2009).
74. Holsclaw, C. M. et al. Structural characterization of a novel sulfated menaquinone produced by stf3 from *Mycobacterium tuberculosis*. *ACS Chem. Biol.* **3**, 619-624 (2008).
75. Mve-Obiang, A. et al. A newly discovered Mycobacterial pathogen isolated from laboratory colonies of *Xenopus* species with lethal infections produces a novel form of mycolactone, the *Mycobacterium ulcerans* macrolide toxin. *Infect. Immun.* **73**, 3307-3312.
76. Driscoll, M. D. et al. Structural and biochemical characterization of *Mycobacterium tuberculosis* CYP142: evidence for multiple cholesterol 27-hydroxylase activities in a human pathogen. *J. Biol. Chem.* **285**, 38270–38282 (2010).
77. Bhattarai, S., Liou, K. & Oh, T. J. Hydroxylation of long chain fatty acids by CYP147F1, a new cytochromeP450 subfamily protein from *Streptomyces peuceitius*. *Arch. Biochem. Biophys.* **539**, 63-69 (2013).
78. Brezna, B. et al. Molecular characterization of cytochrome P450 genes in the polycyclic aromatic hydrocarbon degrading *Mycobacterium vanbaalenii* PYR-1. *Appl. Microbiol. Biotechnol.* **71**, 522-352 (2006).

79. Agnew, C. R. et al. An enlarged, adaptable active site in CYP164 family P450 enzymes, the sole P450 in *Mycobacterium leprae*. *Antimicrob. Agents Chemother.* **56**, 391-402 (2012).
80. Schuler, M. A. P450s in plants, insects, and their fungal pathogens in Cytochrome P450: Structure, mechanism, and biochemistry 4th edn, (eds Ortiz de Montellano, P. R.) Ch. 7, 409-449. (Springer International Publishing, 2015).
81. Neff, M. M. et al. BAS1: A gene regulating brassinosteroid levels and light responsiveness in *Arabidopsis*. *Proc. Natl. Acad. Sci. U.S.A.* **96**, 15316-15323 (1999).
82. Kandel, S. et al. (2005) Cloning, functional expression, and characterization of CYP709C1, the first sub-terminal hydroxylase of long chain fatty acid in plants. Induction by chemicals and methyl jasmonate. *J. Biol. Chem.* **280**, 35881-35889 (2005).
83. David, J-P. et al. The Anopheles gambiae detoxification chip: A highly specific microarray to study metabolic-based insecticide resistance in malaria vectors. *Proc. Natl. Acad. Sci. U.S.A.* **102**, 4080-4084.
84. Reddy, B. P. N., Rao, B. P., Prasad, G. B. K. S. & Raghavendra, K. Identification and classification of detoxification enzymes from *Culex quinquefasciatus* (Diptera: Culicidae). *Bioinformation* **8**, 430-436.
85. Kim, D., Cryle, M. J., Voss, J. J. & Ortiz de Montellano, P. R. (2007) Functional expression and characterization of cytochrome P450 52A21 from *Candida albicans*. *Arch. Biochem. Biophys.* **464**, 213-220 (2007).
86. van Bogaert, I. N., De Mey, M., Develter, D., Soetaert, W. & Vandamme, E. J. Importance of the cytochrome P450 monooxygenase CYP52 family for the sphorolipid-producing yeast *Candida bombicola*. *FEMS Yeast Res.* **9**, 87-94 (2009).
87. Syed, K., Porollo, A., Lam, Y. W., Grimmett, P. E. & Yadav, J. S. CYP63A2, a catalytically versatile fungal P450 monooxygenase capable of oxidizing higher molecular-weight polycyclic aromatic hydrocarbons, alkylphenols, and alkanes. *Appl. Environ. Microbiol.* **79**, 2692-2702.
88. Greer, S. et al. The cytochrome P450 enzyme CYP96A15 is the midchain alkane hydroxylase responsible for formation of secondary alcohols and ketones in stem cuticular wax of *Arabidopsis*. *Plant Physiol.* **145**, 653-667 (2007).
89. Li, H. et al. Cytochrome P450 family member CYP704B2 catalyzes the  $\omega$ -hydroxylation of fatty acids and is required for anther cutin biosynthesis and pollen exine formation in rice. *Plant Cell* **22**, 173-190 (2010).
90. McKinnon, R. A., Sorich, M. J. & Ward, M. B. Cytochrome P450 Part 1: multiplicity and function. *J. Pharm. Pract. Res.* **38**, 55-57 (2008).
91. Rude, M. A. et al. Terminal olefin (1-alkene) biosynthesis by a novel p450 fatty acid decarboxylase from *Jeotgalicoccus* species. *Appl. Environ. Microbiol.* **77**, 1718-27.
